# Supplementary material for: Dynamic validation method of a wireless three-dimensional force sensor integrated into a cycling pedal
Source: Research Square preprint supplement (doi:10.21203/rs.3.rs-6259706/v1), 2025-03-20
Supplement: Supplementary file 1 [file ed04381e31e77b03766879d4.docx]

ANNEXE 1


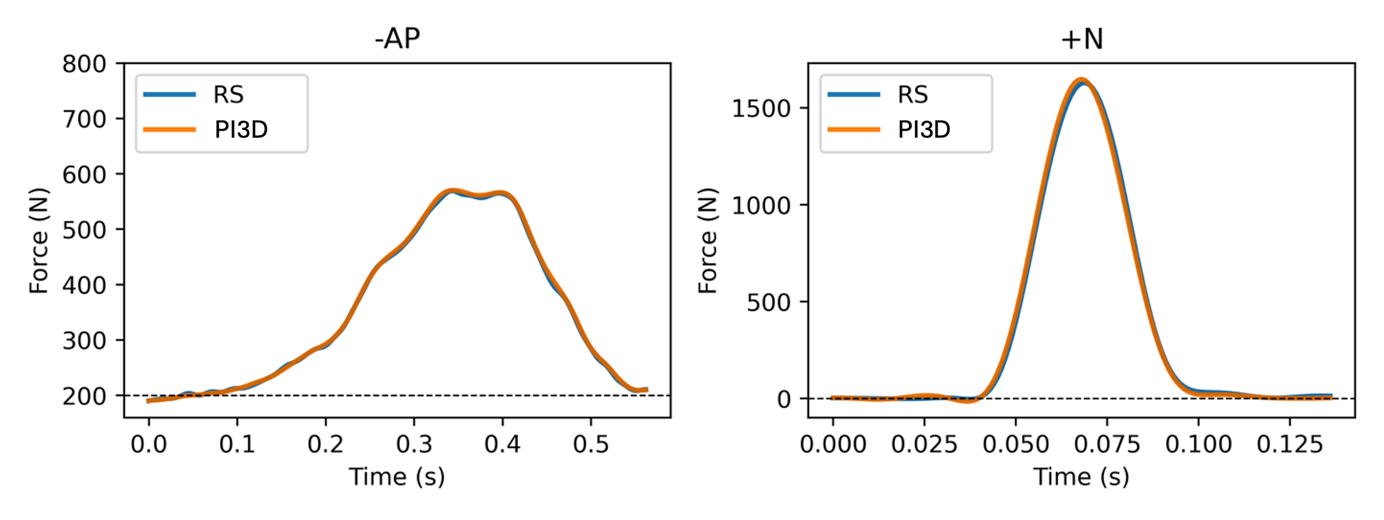


Example of time-synchronized curves for two different conditions: the -AP condition on the left, for which additional force was manually applied to the mass by the operator: +N condition on the right, for which additional force was applied by dropping the mass.
